# Supplementary material for: Recessive GNE Mutations in Korean Nonaka Distal Myopathy Patients with or without Peripheral Neuropathy
Source: MDPI journal article supplement (doi:10.3390/genes15040485), 2024-04-11
Supplement: s1 [file s1]

# Recessive *GNE* Mutations in Korean Nonaka Distal Myopathy Patients with or without Peripheral Neuropathy

Nasrin Tamanna <sup>1</sup>, Byung Kwon Pi <sup>1</sup>, Ah Jin Lee <sup>1</sup>, Sumaira Kanwal <sup>2</sup>, Byung-Ok Choi <sup>3,4,5,\*</sup> and Ki Wha Chung <sup>1,\*</sup>

<sup>1</sup> Department of Biological Sciences, Kongju National University, Gongju 32588, Republic of Korea

<sup>2</sup> Department of Biosciences, COMSATS University Islamabad, Sahiwal, Pakistan

<sup>3</sup> Department of Neurology, Samsung Medical Center, Sungkyunkwan University School of Medicine, Seoul 06351, Republic of Korea

<sup>4</sup> Cell & Gene Therapy Institute, Samsung Medical Center, Seoul 06351, Republic of Korea

<sup>5</sup> Samsung Advanced Institute for Health Sciences & Technology, Seoul 06351, Republic of Korea

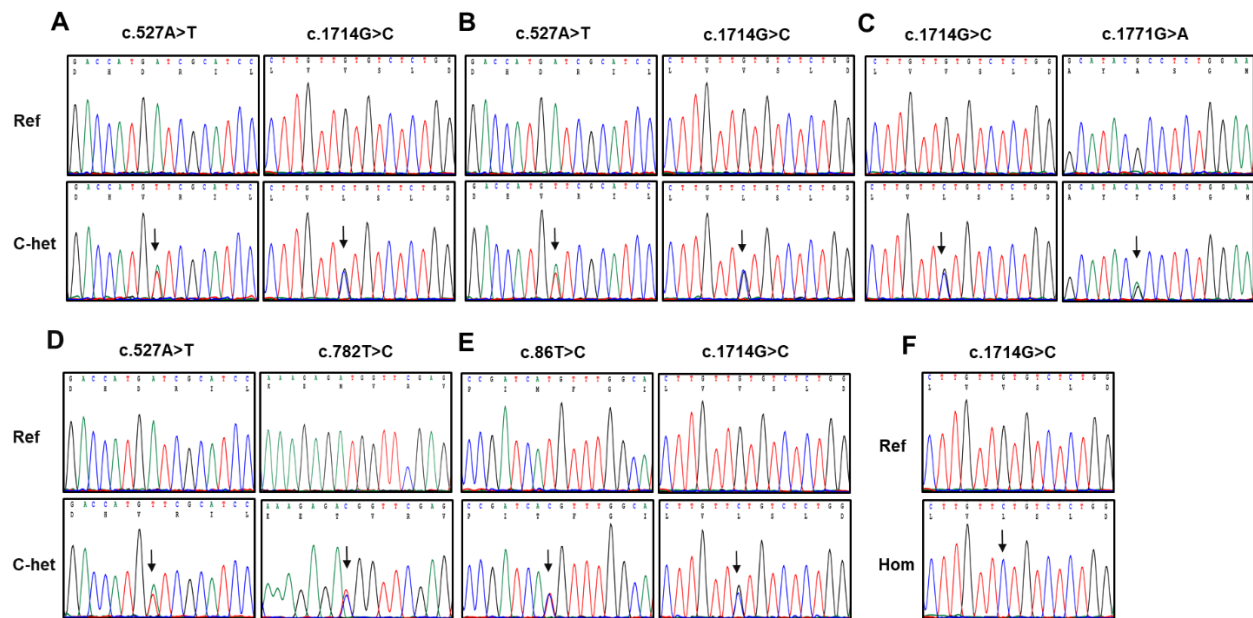

**Figure S1.** Chromatograms of the *GNE* mutations observed in patients with myopathy. Results were derived via Sanger sequencing, and vertical arrows were employed to pinpoint the mutation sites (Ref: reference allele, C-het: compound heterozygote, Hom: homozygote). (A,B) c.527A>T and c.1714G>C mutations in families of Myo-6 and Myo-8, (C) c.1714G>C and c.1771G>A mutations in pedigree Myo24, (D) c.527A>T and c.782T>C mutations in pedigree Myo-35, (E) c.86T>C and c.1714G>C mutations in pedigree Myo-41, and (F) c.1714G>C homozygous mutation in pedigree Myo-12.

**Table S1.** Interpretation of the *GNE* gene variants according to the ACMG/AMP criteria.

| Variants    |             | Criteria                    | Evaluation |
|-------------|-------------|-----------------------------|------------|
| Nucleotides | Amino Acids |                             |            |
| c.86T>C     | p.Met29Thr  | PM1+PM2+PM3+PP1+PP3+PP4     | P          |
| c.527A>T    | p.Asp176Val | PM1+PM2+PM3+PP1+PP3+PP4+PP5 | P          |
| c.782T>C    | p.Met261Thr | PM1+PM2+PM3+PP1+PP3+PP4     | LP         |
| c.1714G>C   | p.Val572Leu | PM1+PM2+PM3+PP1+PP3+PP4+PP5 | P          |
| c.1771G>A   | p.Ala591Thr | PM1+PM2+PM3+PP1+PP3+PP4     | LP         |

Abbreviations: ACMG-AMP: The American College of Medical Genetics and Genomics and the Association for Molecular Pathology, LP: likely pathogenic, P: pathogenic.

**Table S2.** Predicted effects of missense mutations using several bioinformatic tools.

| Variants    | DDG (kcal/mol) <sup>a</sup> |          |        |         |
|-------------|-----------------------------|----------|--------|---------|
|             | MAESTROweb                  | DynaMut2 | PremPS | DeepDDG |
| p.Met29Thr  | 0.39                        | -1.28    | -2.47  | -2.21   |
| p.Asp176Val | -0.15                       | 0.06     | -0.23  | -0.187  |
| p.Met261Thr | 0.33                        | -1.72    | -2.17  | -0.909  |
| p.Val572Leu | 0.03                        | -0.34    | -0.39  | -1.095  |
| p.Ala591Thr | 0.22                        | -1.67    | -1     | -0.762  |

Abbreviations: MAESTROweb: Mutation Analysis for the Estimation of Stability Changes in Proteins Web Server; DynaMut2: Dynamic mutation 2; PremPS: Prediction of the Effects of Missense Mutations using Protein Structure; DeepDDG: Deep Learning-based  $\Delta\Delta G$  (delta delta G).

<sup>a</sup> DDG or  $\Delta\Delta G$  (kcal/mol): difference in Gibbs free energy between two states (wild-type and mutant). A negative value ( $\Delta\Delta G < 0$ ) suggests that the mutant protein destabilizes the protein structure and function compared to the wild type while a positive value ( $\Delta\Delta G > 0$ ) indicates that the mutant stabilizes the protein.
